# Supplementary material
Source: PubMed Central journal article supplement (PMC3546138)
Supplement: NIHMS418921-supplement-1.pdf [file NIHMS418921-supplement-1.pdf]

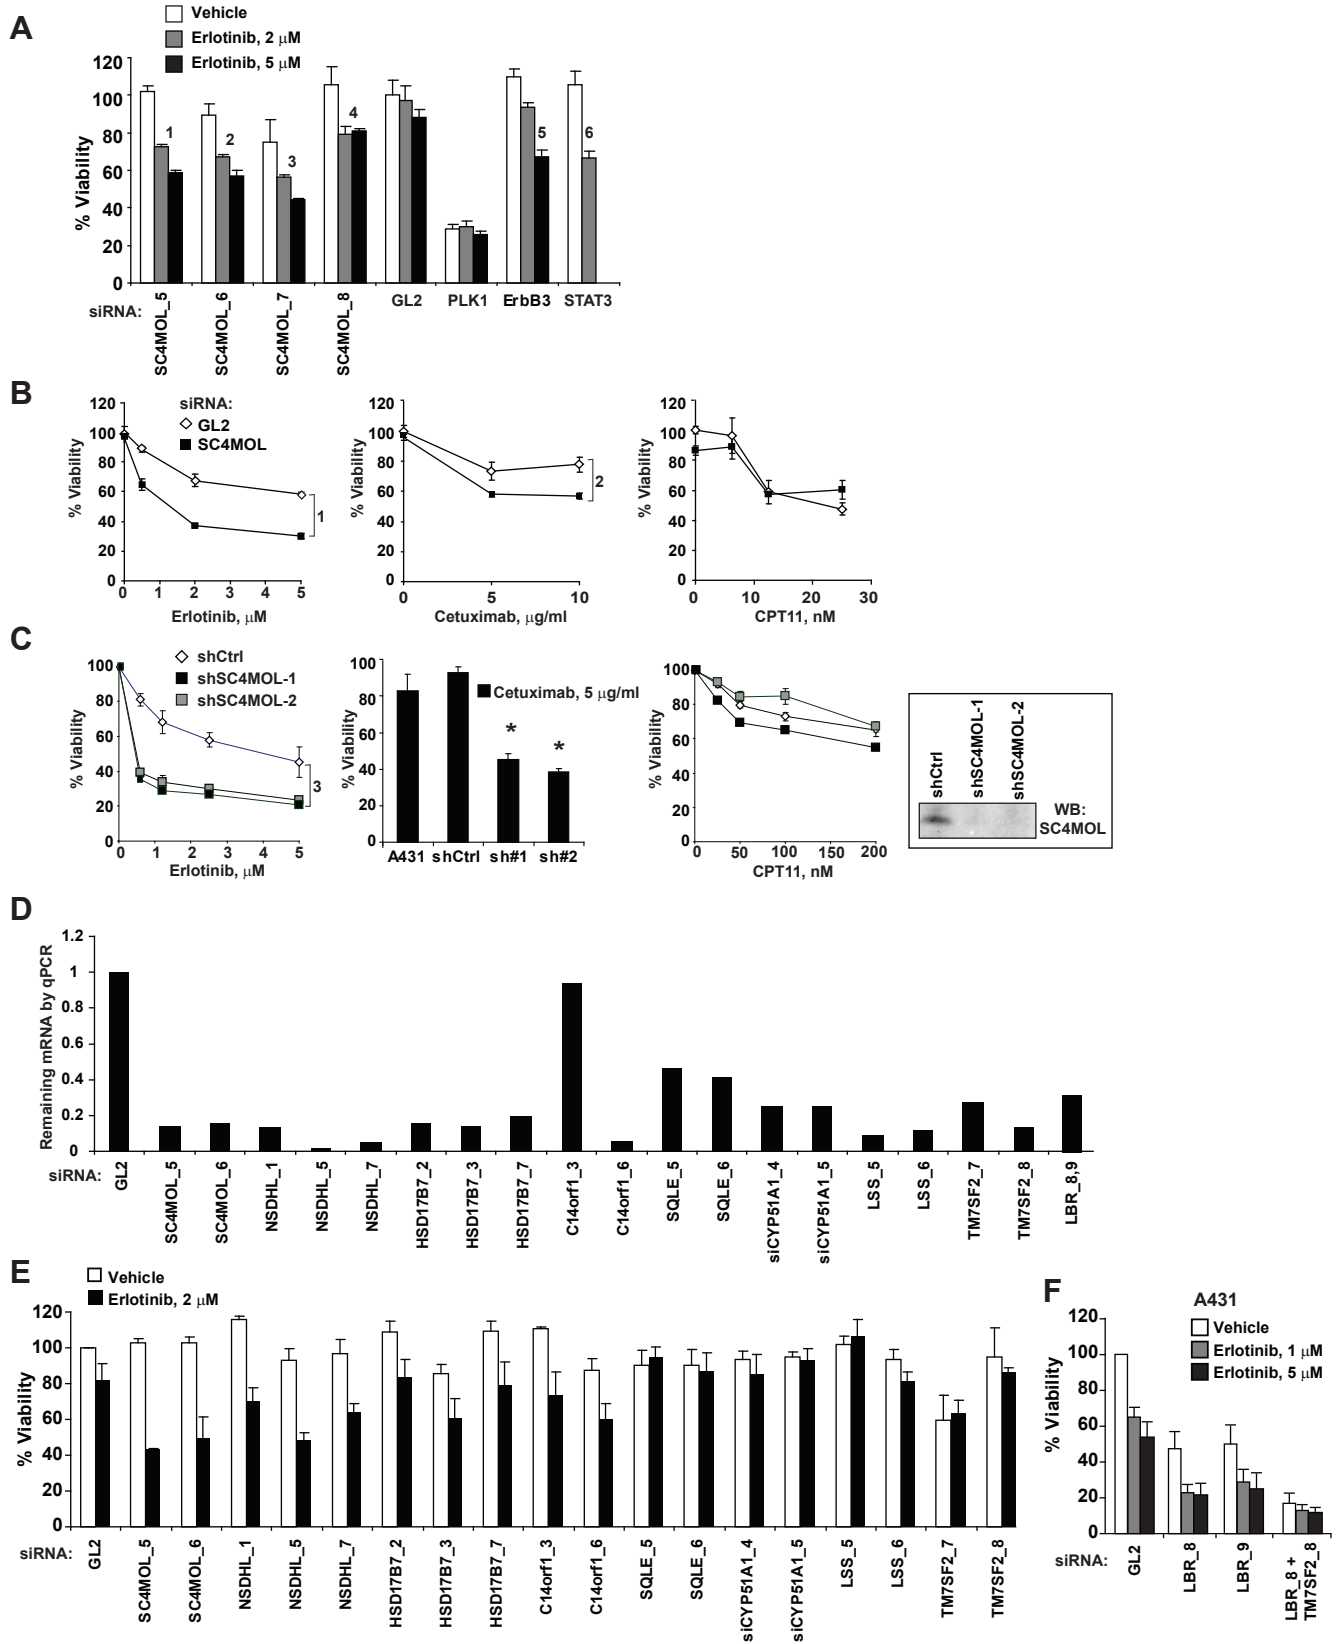

Figure S1. Sukhanova et al.

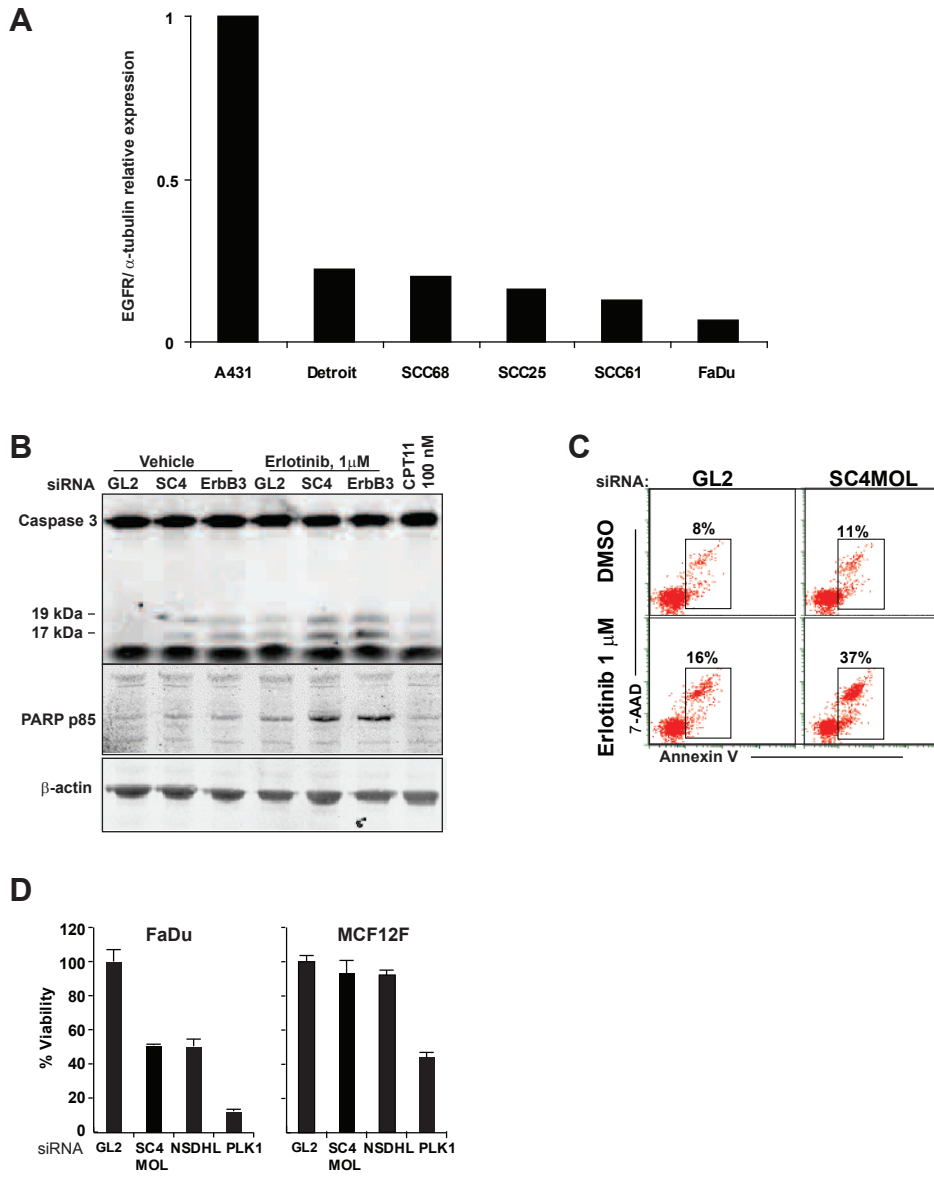

Figure S2. Sukhanova et al.



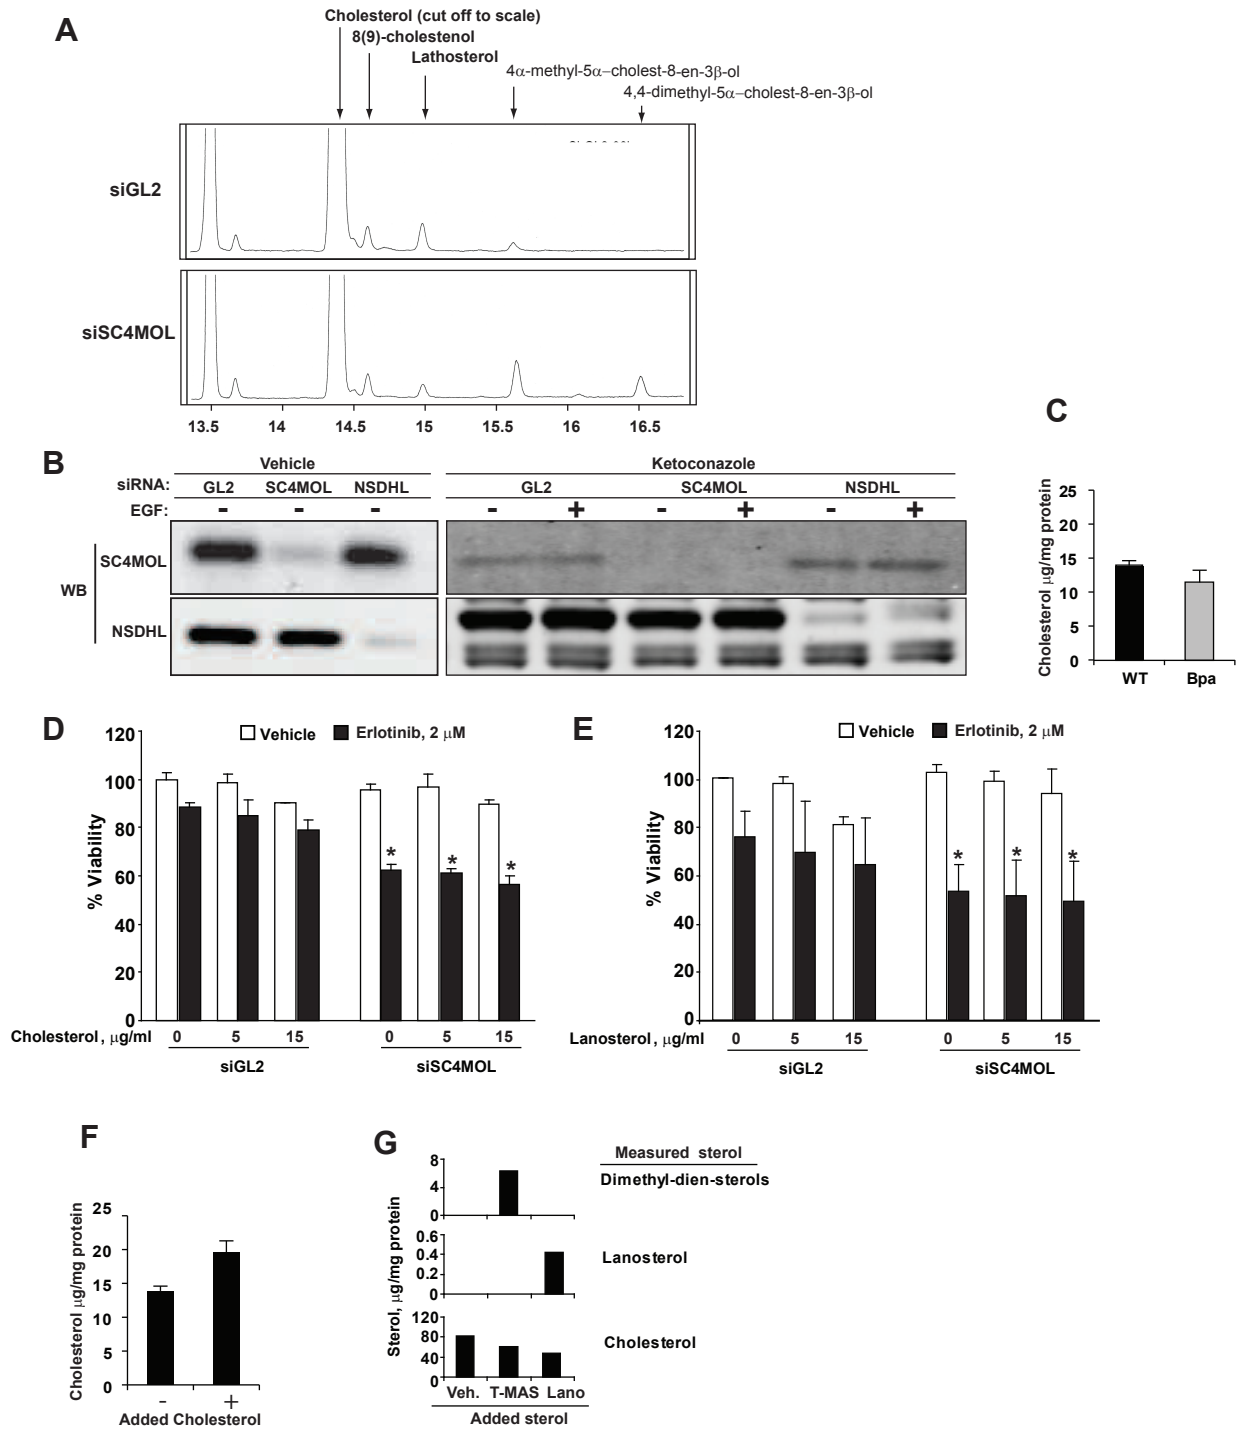

Figure S3. Sukhanova et al.

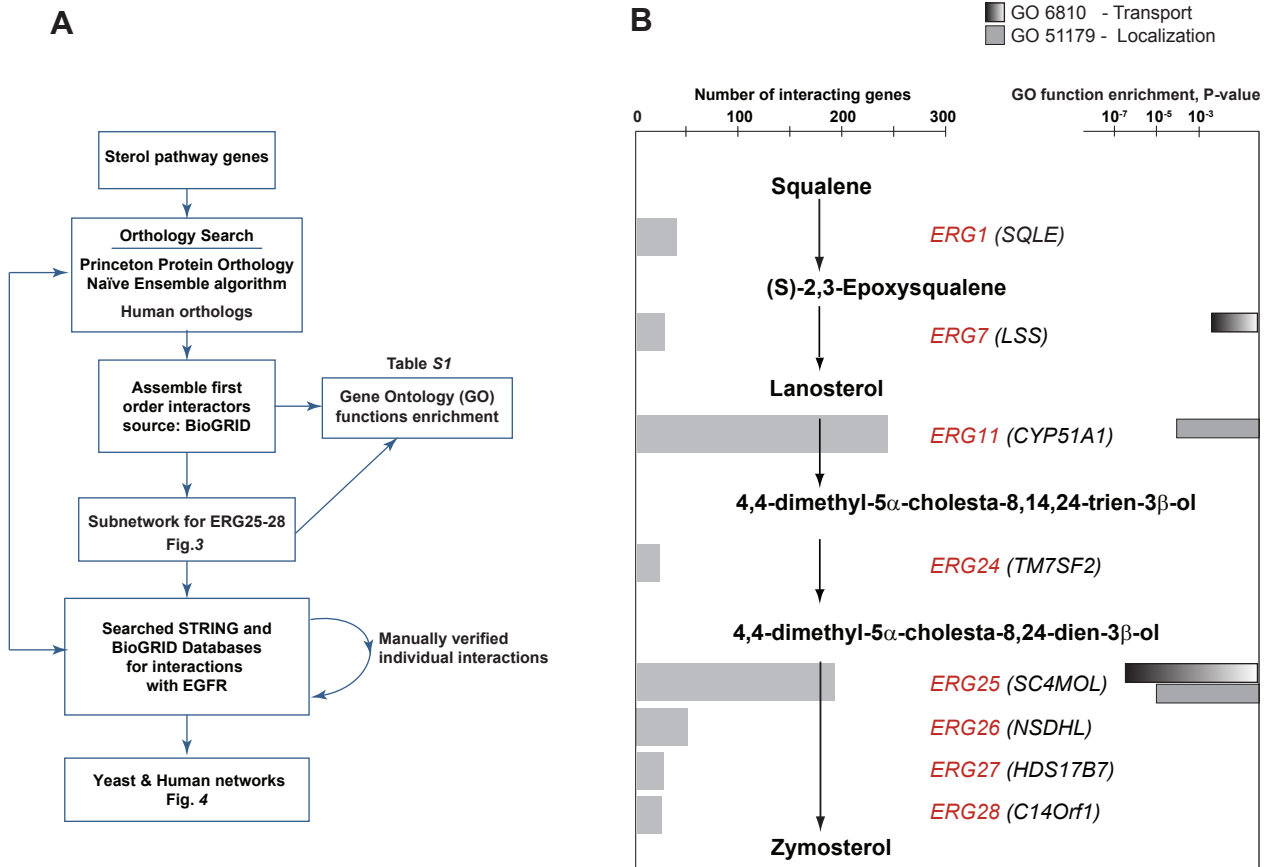

Figure S4. Sukhanova et al.

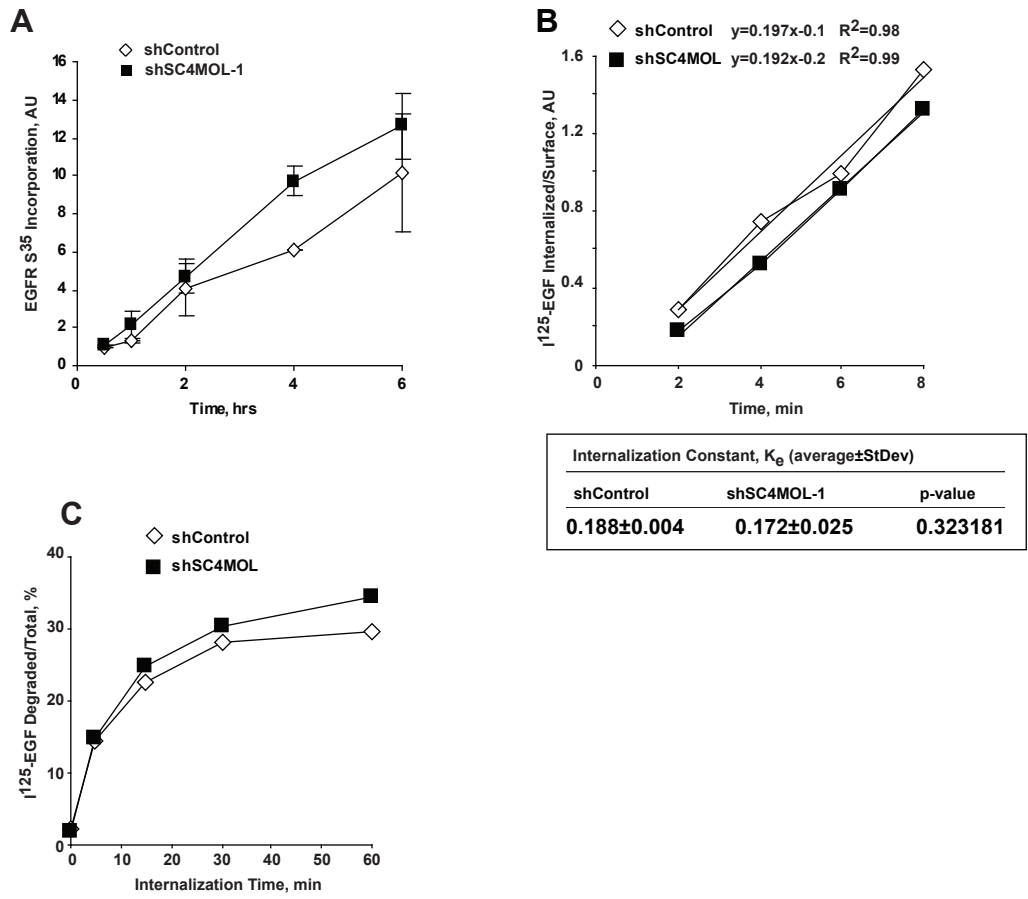

Figure S5. Sukhanova et al.

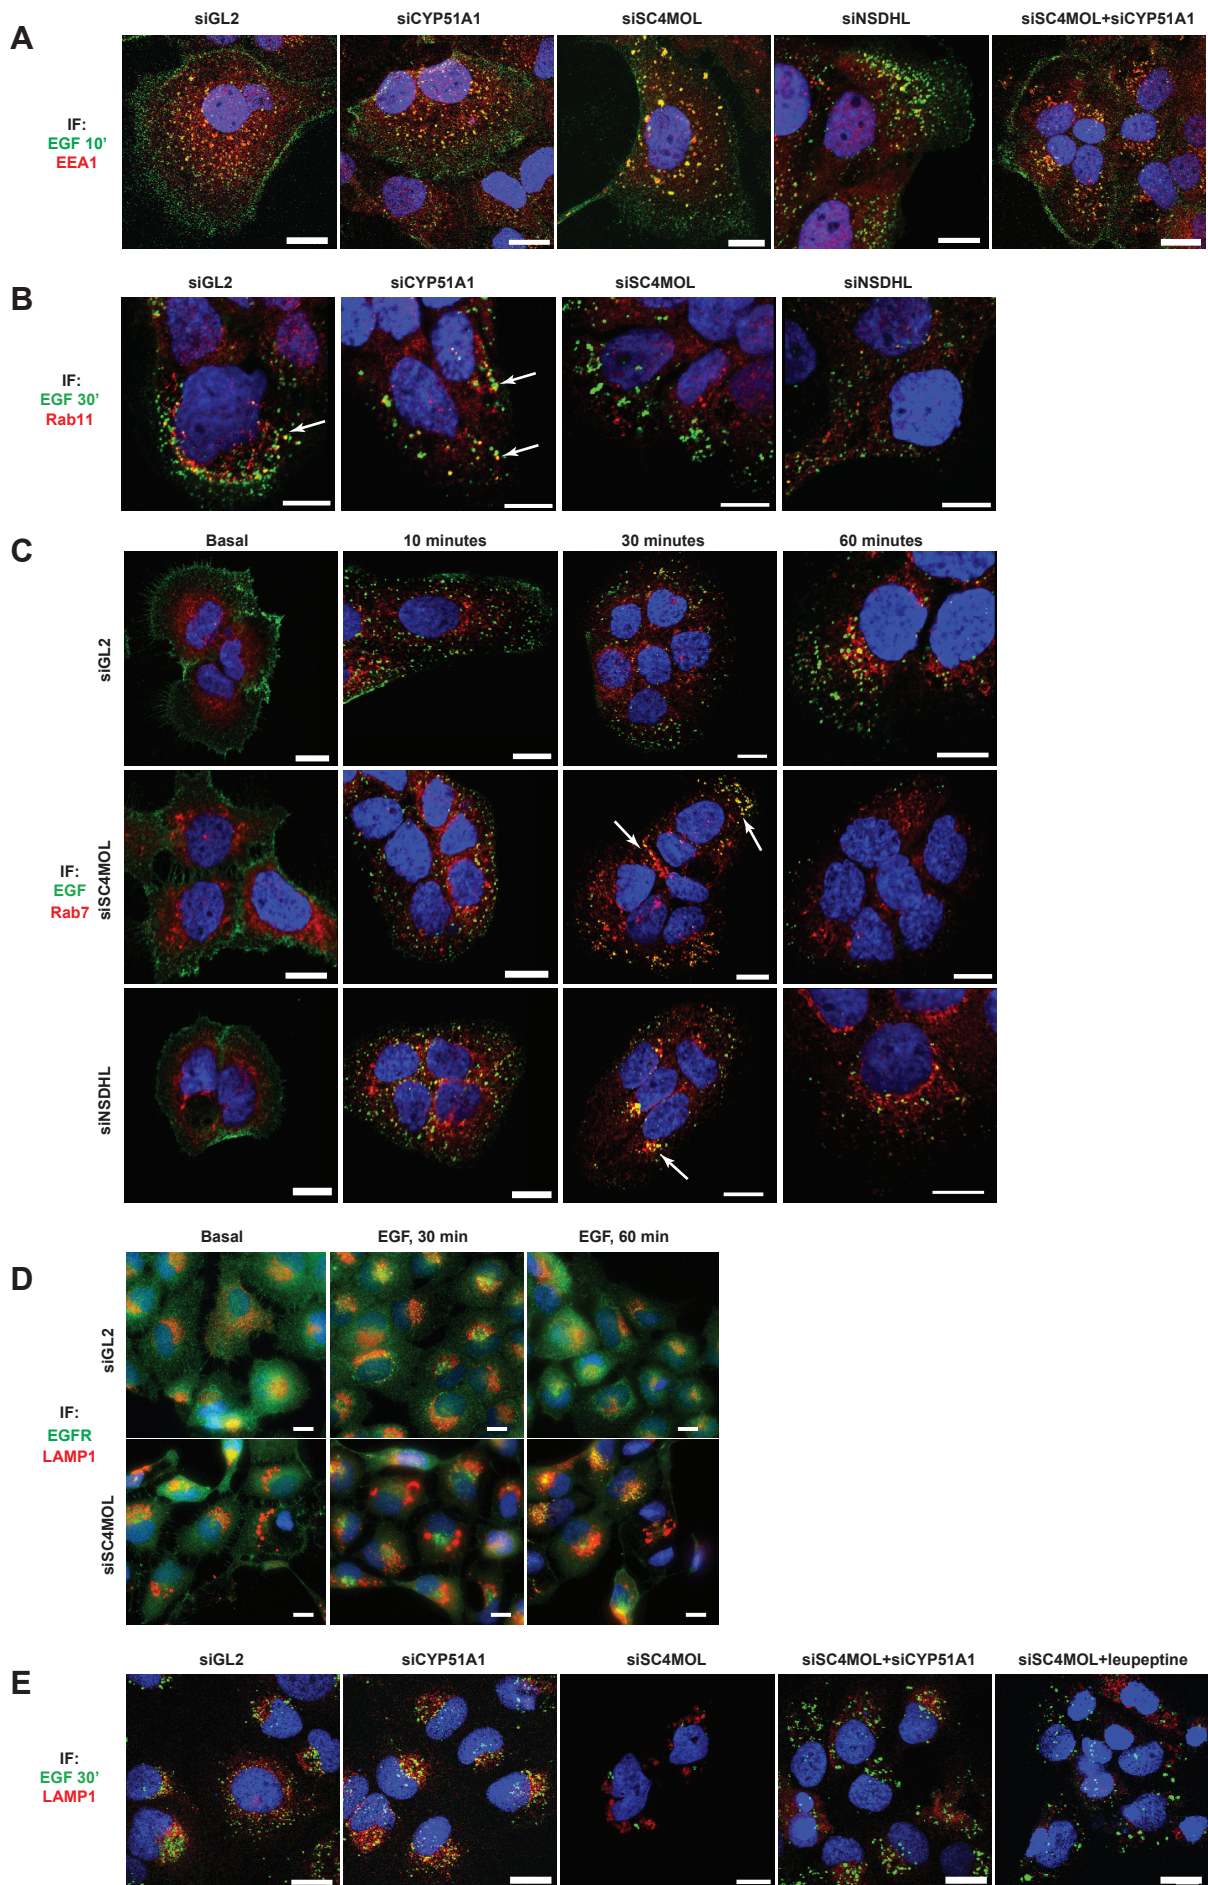

Figure S6. Sukhanova et al.



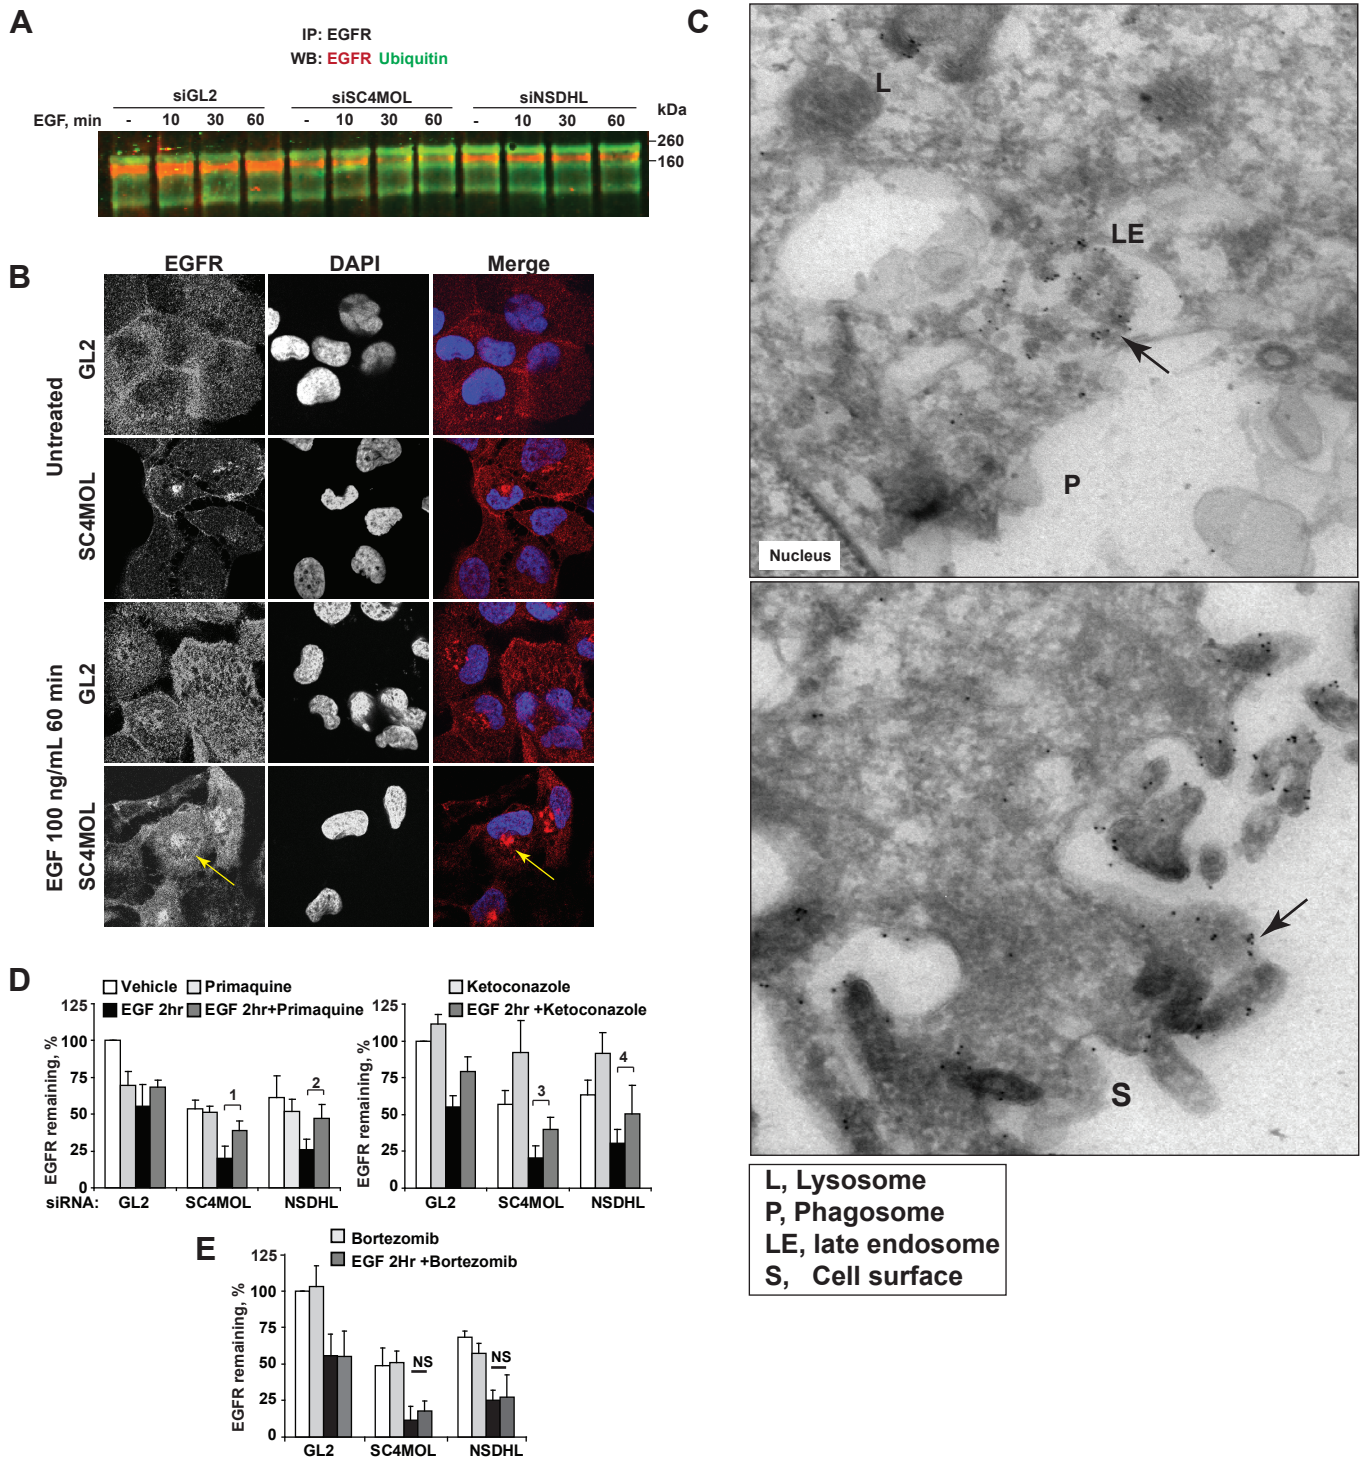

Figure S7. Sukhanova et al.



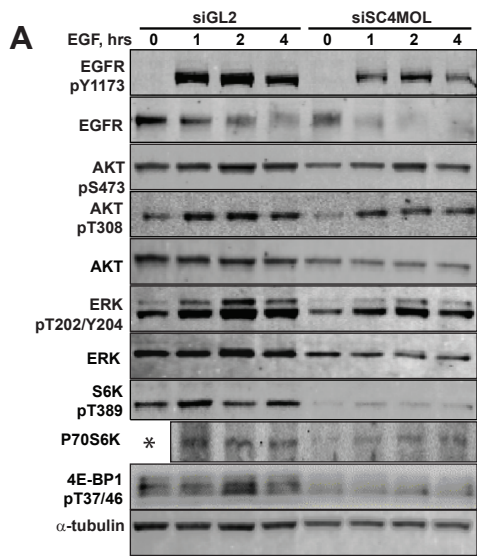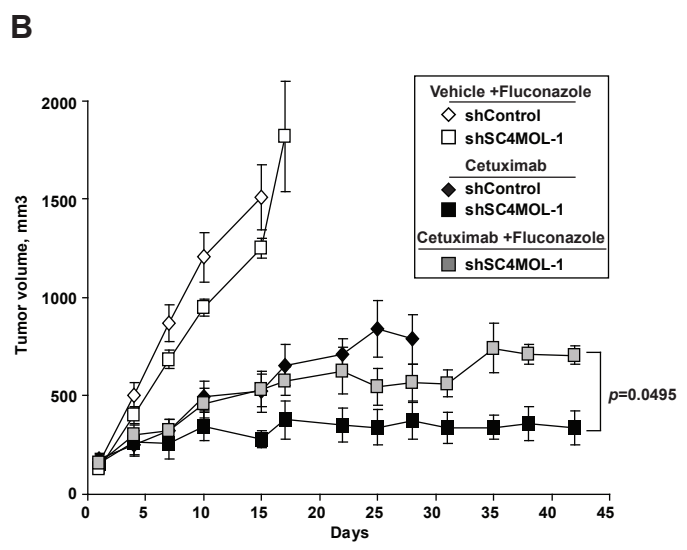

Figure S8. Sukhanova et al.

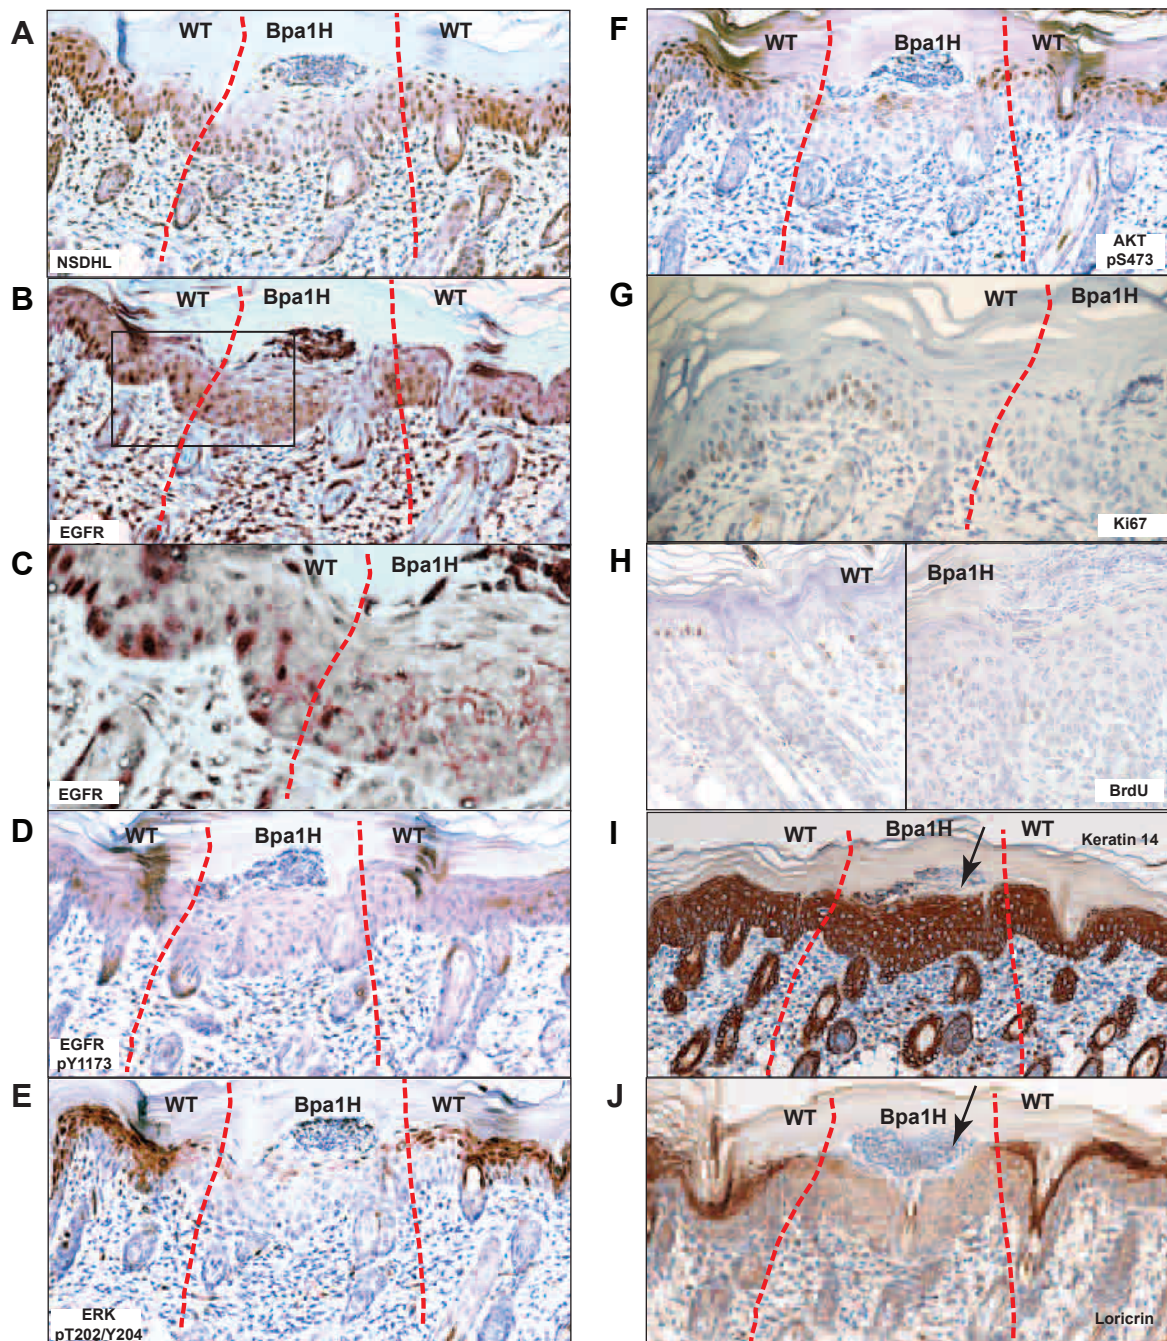

Figure S9. Sukhanova et al.

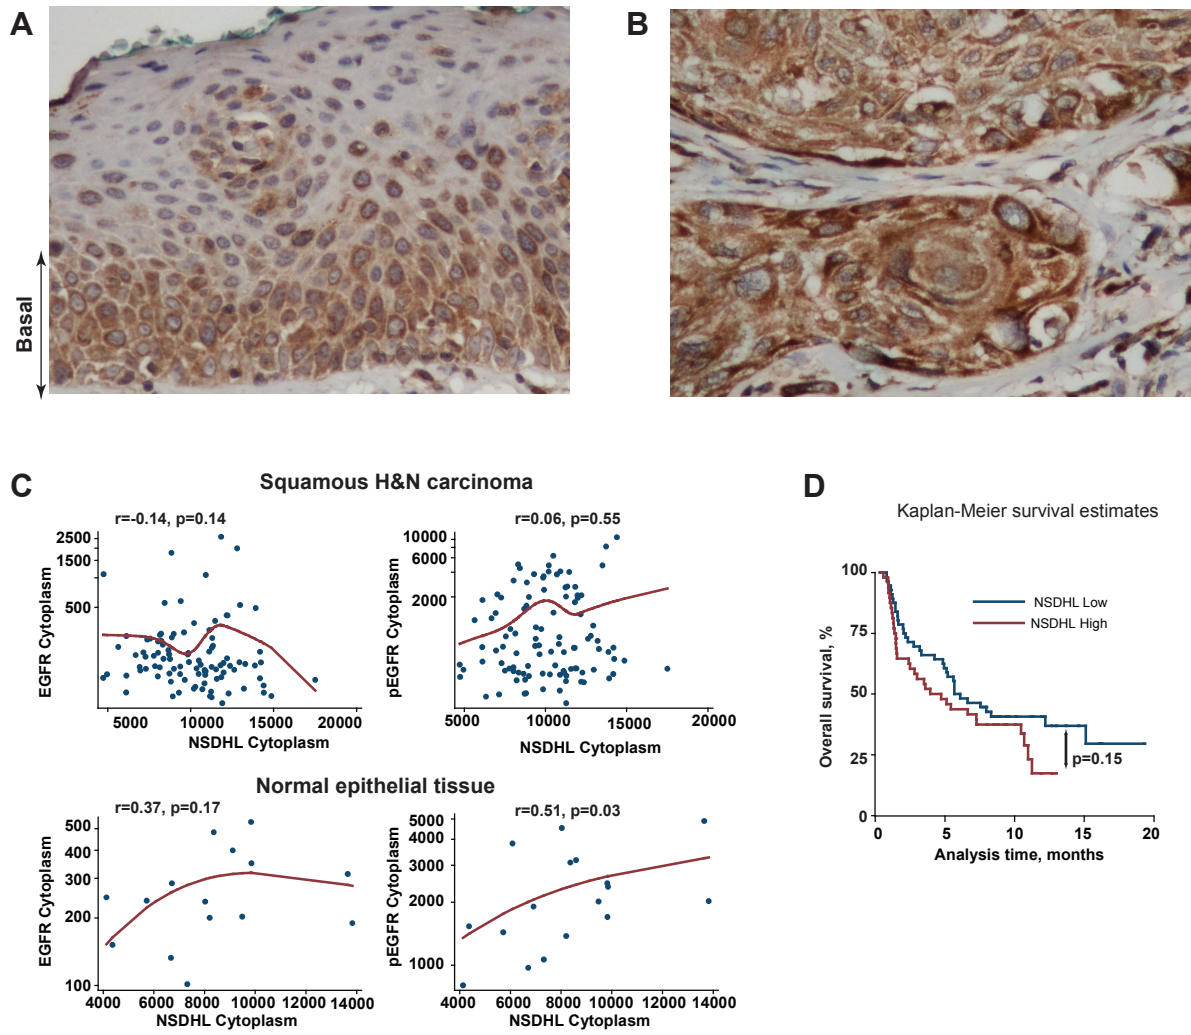

Figure S10. Sukhanova et al.
