# Supplementary material
Source: PubMed Central journal article supplement (PMC3546138)
Supplement: NIHMS418921-supplement-3.pdf [file NIHMS418921-supplement-3.pdf]

| GO:ID sorted | FRG7    | FRG4    | FRG6    | FRG2    | FRG3    | FRG5    | FRG28   | FRG27   | FRG26   | FRG24   | FRG11   | FRG1    | FRG25   | Number of shaGO function |                                               |
|--------------|---------|---------|---------|---------|---------|---------|---------|---------|---------|---------|---------|---------|---------|--------------------------|-----------------------------------------------|
| 6066         | 2.8E-11 | 9.7E-10 | 4.4E-07 | 6E-11   | 8.3E-06 | 0.00001 | 9.8E-16 | 8.4E-15 | 4E-08   | 1.9E-11 | 7E-07   | 2.2E-07 | 2.4E-07 | 13                       | alcohol metabolic process                     |
| 6629         | 1.1E-14 | 8.8E-17 | 8.5E-12 | 3E-21   | 7.6E-11 | 1.1E-13 | 2.7E-16 | 3E-15   | 1.9E-11 | 4.5E-12 | 6.2E-20 | 1.4E-07 | 3E-19   | 13                       | lipid metabolic process                       |
| 6694         | 6.2E-16 | 1.8E-17 | 1E-12   | 1.2E-12 | 2.9E-09 | 9.7E-10 | 5.1E-29 | 6.1E-26 | 1.7E-20 | 4.3E-22 | 7.6E-17 | 1.1E-15 | 1.6E-14 | 13                       | steroid biosynthetic process                  |
| 6696         | 1.1E-17 | 5.6E-17 | 1.8E-12 | 6.5E-12 | 1.6E-11 | 6.1E-10 | 6.7E-27 | 1.3E-28 | 8.3E-21 | 3.3E-24 | 8.6E-15 | 1.6E-17 | 3.2E-16 | 13                       | ergosterol biosynthetic process               |
| 8202         | 9.3E-18 | 1.4E-17 | 6.3E-12 | 7.7E-14 | 5.9E-09 | 6.4E-08 | 1.4E-26 | 9.7E-26 | 5.8E-18 | 5.4E-20 | 7.9E-16 | 7.7E-14 | 1.4E-11 | 13                       | steroid metabolic process                     |
| 8204         | 2.1E-17 | 1.7E-16 | 6.3E-12 | 2.7E-11 | 4E-11   | 9.7E-10 | 1.9E-26 | 3.5E-28 | 1.7E-20 | 6.2E-24 | 4.4E-14 | 2.6E-17 | 1.4E-15 | 13                       | ergosterol metabolic process                  |
| 8610         | 4.6E-12 | 1.4E-17 | 6.4E-14 | 7.2E-17 | 1.4E-09 | 1.1E-13 | 1.6E-18 | 9.1E-16 | 7.2E-12 | 1.9E-15 | 2.4E-27 | 3.7E-08 | 1.2E-17 | 13                       | lipid biosynthetic process                    |
| 16125        | 7.9E-18 | 1.1E-17 | 1.8E-12 | 1.9E-13 | 2.7E-09 | 3.4E-08 | 6.7E-27 | 5E-26   | 2.4E-18 | 2.6E-20 | 1.9E-16 | 4.1E-14 | 4.9E-12 | 13                       | sterol metabolic process                      |
| 16126        | 6.2E-16 | 1.8E-17 | 1E-12   | 1.2E-12 | 2.9E-09 | 9.7E-10 | 5.1E-29 | 6.1E-26 | 1.7E-20 | 4.3E-22 | 7.6E-17 | 1.1E-15 | 1.6E-14 | 13                       | sterol biosynthetic process                   |
| 16128        | 2.1E-17 | 1.7E-16 | 6.3E-12 | 2.7E-11 | 4E-11   | 9.7E-10 | 1.9E-26 | 3.5E-28 | 1.7E-20 | 6.2E-24 | 4.4E-14 | 2.6E-17 | 1.4E-15 | 13                       | phytosteroid metabolic process                |
| 16129        | 1.1E-17 | 5.6E-17 | 1.8E-12 | 6.5E-12 | 1.6E-11 | 6.1E-10 | 6.7E-27 | 1.3E-28 | 8.3E-21 | 3.3E-24 | 8.6E-15 | 1.6E-17 | 3.2E-16 | 13                       | phytosteroid biosynthetic process             |
| 43094        | 8E-08   | 0.0001  | 0.00486 | 0.0024  | 0.00032 | 0.00047 | 2.1E-08 | 1E-09   | 5.8E-07 | 1.3E-08 | 0.00002 | 0.00006 | 0.00007 | 13                       | cellular metabolic compound salvage           |
| 44255        | 7.7E-10 | 1.5E-10 | 1.3E-08 | 7.2E-17 | 7.6E-09 | 9.7E-10 | 0.00001 | 2.4E-06 | 0.00003 | 0.00012 | 5.3E-15 | 0.00025 | 3.2E-16 | 13                       | cellular lipid metabolic process              |
| 44281        | 4.5E-06 | 0.00008 | 9.4E-07 | 1.9E-13 | 0.00062 | 0.00001 | 2.6E-07 | 1.7E-07 | 0.00083 | 7.8E-06 | 1.7E-06 | 4E-06   | 3.4E-06 | 13                       | small molecule metabolic process              |
| 6633         | 0.04578 | 0.00033 | 0.0077  | 0.00011 | 4E-07   | 0.00094 | 0.02845 | 0.04052 | 0.00804 | 0.00069 | 0.00039 | #N/A    | 0.00007 | 12                       | fatty acid biosynthetic process               |
| 55114        | 0.00745 | 0.00448 | 0.00666 | 0.00013 | 0.00341 | #N/A    | 0.00002 | 6E-06   | 0.00422 | 0.00015 | 0.01519 | 0.00014 | 0.00038 | 12                       | oxidation reduction                           |
| 9058         | #N/A    | 0.0115  | 0.00116 | 0.00004 | 0.00744 | 0.00039 | 0.00119 | 0.03087 | #N/A    | 0.00119 | 0.02966 | 0.01695 | #N/A    | 10                       | biosynthetic process                          |
| 6631         | 0.00172 | 0.02001 | #N/A    | 0.00038 | 0.00021 | 0.04024 | #N/A    | 0.02279 | #N/A    | 0.0126  | 0.00218 | #N/A    | 0.00026 | 9                        | fatty acid metabolic process                  |
| 44238        | #N/A    | #N/A    | #N/A    | 0.00225 | 0.00345 | 0.00012 | 0.01536 | #N/A    | #N/A    | 0.00661 | 0.01519 | 0.03686 | #N/A    | 7                        | primary metabolic process                     |
| 6643         | #N/A    | 0.00018 | 1.5E-06 | 1.6E-10 | 0.00002 | 0.00494 | #N/A    | #N/A    | #N/A    | #N/A    | 0.00449 | #N/A    | 0.00001 | 7                        | membrane lipid metabolic process              |
| 6665         | #N/A    | 0.00018 | 1.5E-06 | 1.6E-10 | 0.00002 | 0.00494 | #N/A    | #N/A    | #N/A    | #N/A    | 0.00449 | #N/A    | 0.00001 | 7                        | sphingolipid metabolic process                |
| 6810         | #N/A    | 0.01931 | 0.00014 | 0.00003 | 2.2E-06 | 0.00012 | #N/A    | #N/A    | #N/A    | #N/A    | 0.00017 | #N/A    | 0.00001 | 7                        | transport                                     |
| 8104         | #N/A    | 0.01478 | 0.00003 | 0.00075 | 1.2E-07 | 0.00001 | #N/A    | #N/A    | #N/A    | #N/A    | 0.01528 | #N/A    | 0.01206 | 7                        | protein localization                          |
| 9987         | #N/A    | 0.01478 | 3.1E-06 | 7.7E-09 | 1.6E-09 | 0.00002 | #N/A    | #N/A    | #N/A    | #N/A    | 0.00411 | #N/A    | 0.00387 | 7                        | cellular process                              |
| 15031        | #N/A    | 0.02366 | 0.00011 | 0.00057 | 9.6E-07 | 0.00003 | #N/A    | #N/A    | #N/A    | #N/A    | 0.01512 | #N/A    | 0.02074 | 7                        | protein transport                             |
| 33036        | #N/A    | 0.00879 | 3E-06   | 0.00011 | 9.3E-09 | 5.4E-06 | #N/A    | #N/A    | #N/A    | #N/A    | 0.00267 | #N/A    | 0.01168 | 7                        | macromolecule localization                    |
| 45184        | #N/A    | 0.0115  | 0.00018 | 0.00075 | 1.6E-06 | 0.00001 | #N/A    | #N/A    | #N/A    | #N/A    | 0.01512 | #N/A    | 0.00852 | 7                        | establishment of protein localization         |
| 46907        | #N/A    | 0.02611 | 0.00005 | 0.00033 | 7E-06   | 0.00372 | #N/A    | #N/A    | #N/A    | #N/A    | 0.02329 | #N/A    | 0.02047 | 7                        | intracellular transport                       |
| 48193        | 0.01205 | 0.00033 | 0.00513 | 0.00008 | 7.2E-06 | 0.04739 | #N/A    | #N/A    | #N/A    | #N/A    | #N/A    | #N/A    | 3.4E-06 | 7                        | Golgi vesicle transport                       |
| 51179        | #N/A    | 0.02366 | 1.9E-06 | 0.00009 | 5.7E-09 | 0.00006 | #N/A    | #N/A    | #N/A    | #N/A    | 0.00031 | #N/A    | 9.8E-06 | 7                        | localization                                  |
| 51234        | #N/A    | 0.0175  | 0.00003 | 0.00006 | 3.4E-07 | 0.00005 | #N/A    | #N/A    | #N/A    | #N/A    | 0.00008 | #N/A    | 8.5E-06 | 7                        | establishment of localization                 |
| 51641        | #N/A    | 0.04925 | 9.9E-08 | 0.00007 | 2.5E-09 | 0.00009 | #N/A    | #N/A    | #N/A    | #N/A    | 0.01948 | #N/A    | 0.00822 | 7                        | cellular localization                         |
| 6869         | #N/A    | 0.03848 | 0.00034 | 0.01302 | 0.02377 | 0.01642 | #N/A    | #N/A    | #N/A    | #N/A    | 0.02329 | #N/A    | #N/A    | 6                        | lipid transport                               |
| 6984         | #N/A    | 0.01795 | 0.00528 | 0.02047 | 0.00333 | 0.01311 | #N/A    | #N/A    | #N/A    | #N/A    | 0.00819 | #N/A    | #N/A    | 6                        | ER-nucleus signaling pathway                  |
| 10876        | #N/A    | 0.04428 | 0.00051 | 0.01617 | 0.02848 | 0.01925 | #N/A    | #N/A    | #N/A    | #N/A    | 0.00819 | #N/A    | #N/A    | 6                        | lipid localization                            |
| 6644         | #N/A    | 0.00568 | 0.02149 | 0.00016 | #N/A    | 0.00001 | #N/A    | #N/A    | #N/A    | #N/A    | 0.00002 | #N/A    | 0.00096 | 6                        | phospholipid metabolic process                |
| 6650         | #N/A    | 0.01341 | 0.04343 | 0.00368 | #N/A    | 0.00035 | #N/A    | #N/A    | #N/A    | #N/A    | 0.00005 | #N/A    | 0.00991 | 6                        | glycerophospholipid metabolic process         |
| 16192        | #N/A    | 8.6E-06 | 0.00513 | 6E-09   | 5.8E-11 | 0.00003 | #N/A    | #N/A    | #N/A    | #N/A    | #N/A    | #N/A    | 1.5E-08 | 6                        | vesicle-mediated transport                    |
| 19637        | #N/A    | 0.00674 | 0.02705 | 0.00007 | #N/A    | 0.00001 | #N/A    | #N/A    | #N/A    | #N/A    | 0.00002 | #N/A    | 0.00129 | 6                        | organophosphate metabolic process             |
| 32787        | 0.02809 | 0.01139 | #N/A    | 0.00075 | 0.03196 | #N/A    | #N/A    | #N/A    | #N/A    | #N/A    | 0.02329 | #N/A    | 0.00331 | 6                        | monocarboxylic acid metabolic process         |
| 46486        | #N/A    | 0.0175  | 0.02889 | 0.00653 | #N/A    | 0.0001  | #N/A    | #N/A    | #N/A    | #N/A    | 0.00002 | #N/A    | 0.0154  | 6                        | glycerolipid metabolic process                |
| 51649        | #N/A    | #N/A    | 5.9E-06 | 0.00004 | 9.6E-08 | 0.00035 | #N/A    | #N/A    | #N/A    | #N/A    | 0.00287 | #N/A    | 0.01819 | 6                        | establishment of localization in cell         |
| 6464         | #N/A    | 0.00074 | 0.00107 | 0.01459 | 0.0119  | 0.01311 | #N/A    | 5                        | protein modification process                  |
| 6673         | #N/A    | 0.03763 | 0.03084 | 0.00275 | 0.01996 | 0.00372 | #N/A    | 5                        | inositolphosphoceramide metabolic process     |
| 8152         | #N/A    | #N/A    | #N/A    | 0.00028 | 0.00089 | 0.00004 | #N/A    | #N/A    | #N/A    | 0.02464 | #N/A    | 0.02404 | #N/A    | 5                        | metabolic process                             |
| 16053        | #N/A    | #N/A    | 0.00513 | 0.00954 | 0.00147 | 0.00476 | #N/A    | #N/A    | #N/A    | #N/A    | 0.04902 | #N/A    | #N/A    | 5                        | organic acid biosynthetic process             |
| 23033        | #N/A    | 0.0243  | 0.01859 | 0.00129 | 0.00002 | 0.04106 | #N/A    | 5                        | signaling pathway                             |
| 23034        | #N/A    | 0.0132  | 0.01753 | 0.0026  | 0.00002 | 0.01971 | #N/A    | 5                        | intracellular signaling pathway               |
| 46394        | #N/A    | #N/A    | 0.00513 | 0.00954 | 0.00147 | 0.00476 | #N/A    | #N/A    | #N/A    | #N/A    | 0.04902 | #N/A    | #N/A    | 5                        | carboxylic acid biosynthetic process          |
| 6672         | #N/A    | #N/A    | 0.0274  | 0.00033 | 0.01539 | 0.00145 | #N/A    | #N/A    | #N/A    | #N/A    | #N/A    | #N/A    | 0.00062 | 5                        | ceramide metabolic process                    |
| 46519        | #N/A    | #N/A    | 0.04047 | 0.00007 | 0.02393 | 0.00252 | #N/A    | #N/A    | #N/A    | #N/A    | #N/A    | #N/A    | 0.00129 | 5                        | sphingoid metabolic process                   |
| 70972        | #N/A    | #N/A    | 0.00681 | 0.04887 | #N/A    | 0.04003 | #N/A    | #N/A    | #N/A    | #N/A    | 0.00198 | #N/A    | 0.00031 | 5                        | protein localization in endoplasmic reticulum |

P-values of enrichment relative to the yeast genome
